# Supplementary material for: APOBEC3B regulates R-loops and promotes transcription-associated mutagenesis in cancer
Source: PubMed Central journal article supplement (PMC10562255; doi:10.1038/s41588-023-01504-w), 2023-09-21

# Figure 1

**c**

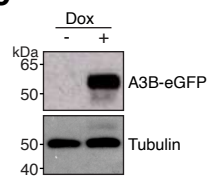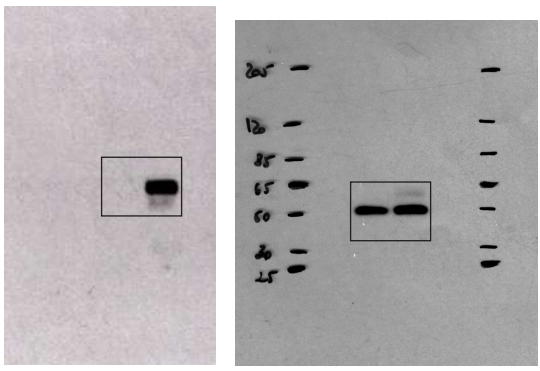

**d**

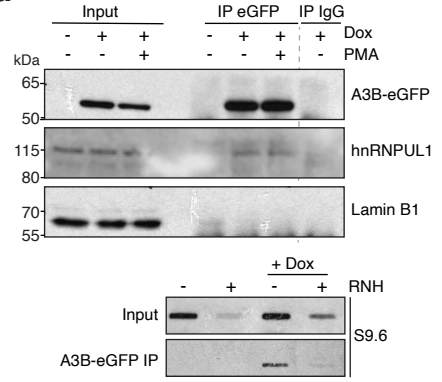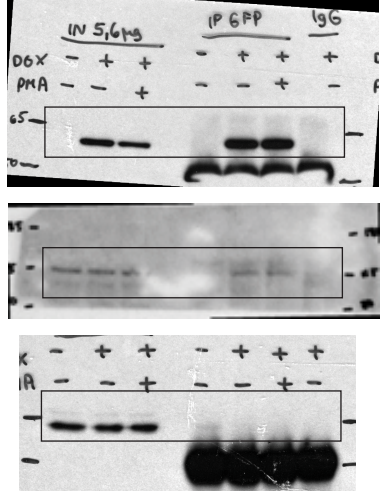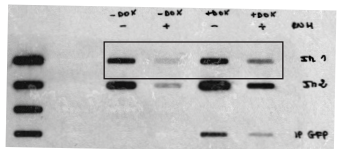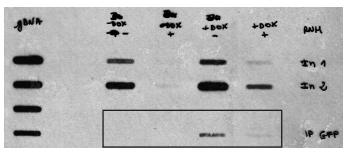

**e**

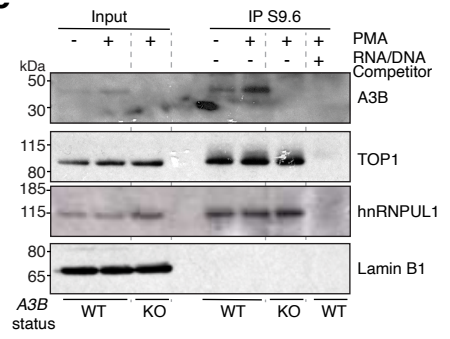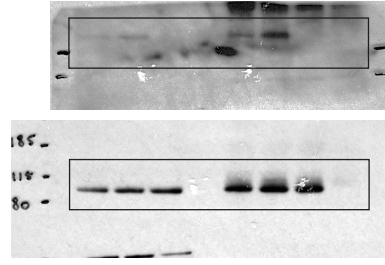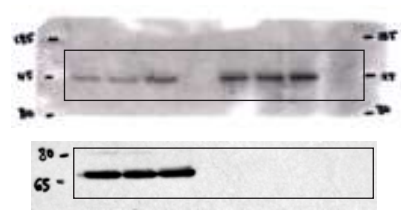

Supplement: 41588_2023_1504_MOESM5_ESM.pdf [file 41588_2023_1504_MOESM5_ESM.pdf]
